# Supplementary material for: Mesenchymal stem cells in inflammatory microenvironment potently promote metastatic growth of cholangiocarcinoma via activating Akt/NF-κB signaling by paracrine CCL5
Source: PubMed Central journal article supplement (PMC5650292; doi:10.18632/oncotarget.17793), 2017-05-11
Supplement: oncotarget-08-73693-s001.pdf [file oncotarget-08-73693-s001.pdf]

# Mesenchymal stem cells in inflammatory microenvironment potently promote metastatic growth of cholangiocarcinoma *via* activating Akt/NF-κB signaling by paracrine CCL5

## SUPPLEMENTARY MATERIALS

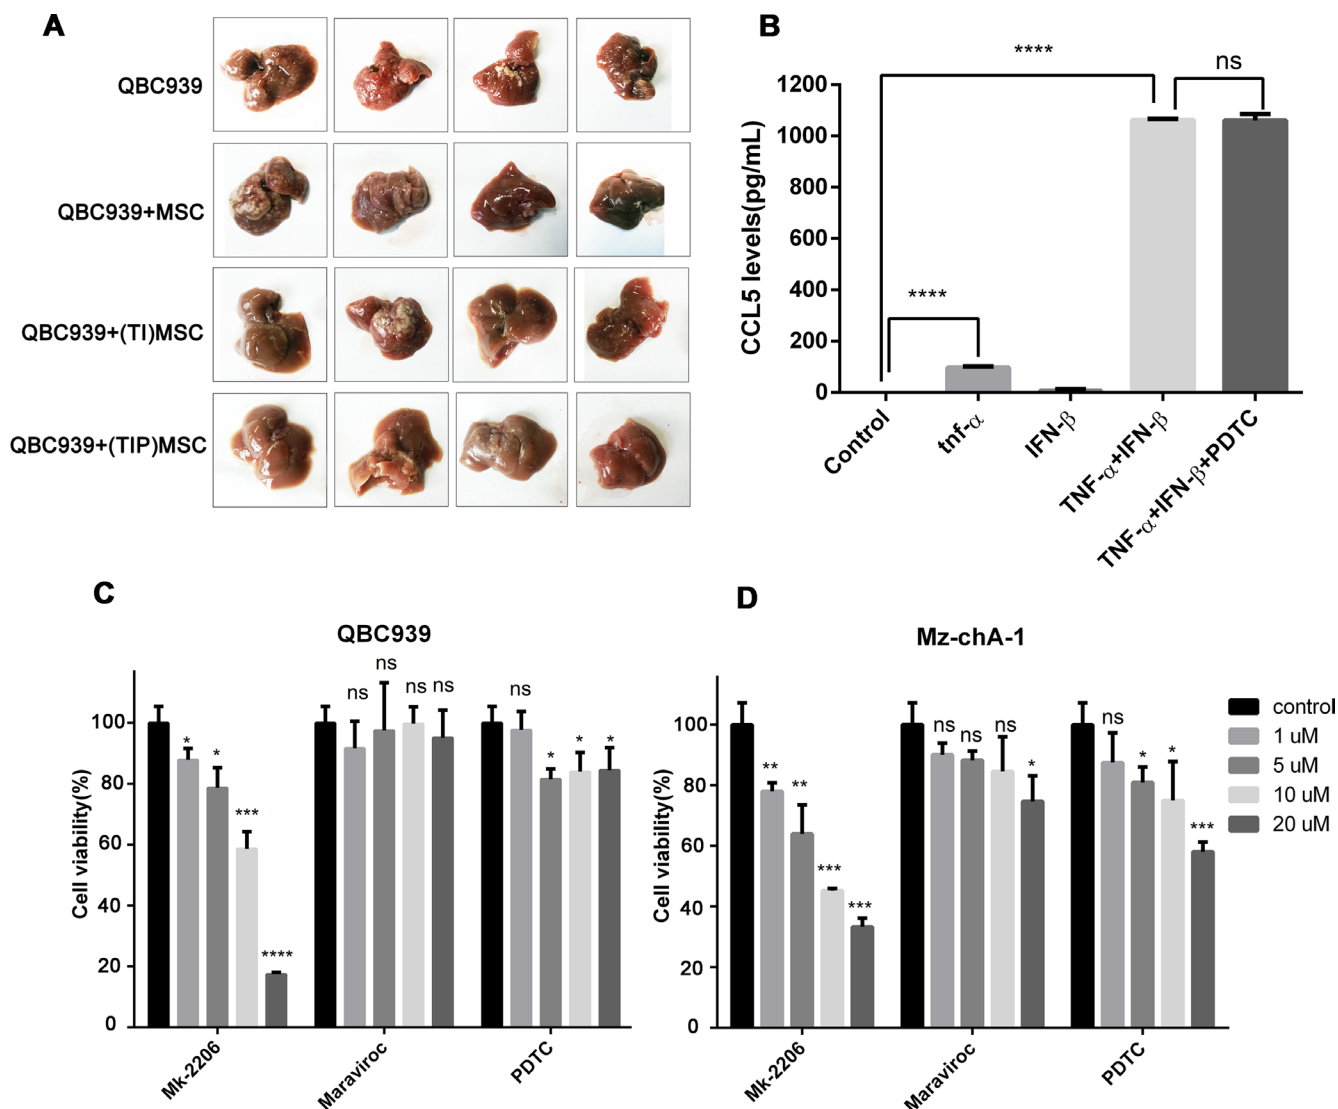

**Supplementary Figure 1:** (A) Picture showing metastasized tumor nodules in liver tissue. (B) PDTC can not inhibit the expression of CCL5 which induced by TNF- $\alpha$  and IFN- $\gamma$ . (C–D) Effects of MK-2206, Maraviroc and PDTC on cell viability of QBC939 (C) and Mz-chA-1 (D). Data are presented as means  $\pm$  SD. \* $P < 0.05$ , \*\* $P < 0.01$ , \*\*\* $P < 0.001$ , \*\*\*\* $P < 0.0001$ ; two-tailed Student's  $t$  test.

**Supplementary Table 1: Real-time RT-PCR primers**

| <b>Gene</b>                    | <b>Forward primer(5'-3')</b> | <b>Reverse primer(5'-3')</b> |
|--------------------------------|------------------------------|------------------------------|
| <i>IL-6</i>                    | GGCACTGGCAGAAAACAACC         | GCAAGTCTCCTCATTGAATCC        |
| <i>TNF-<math>\alpha</math></i> | GGCGTGGAGCTGAGAGATAAC        | GGTGTGGGTGAGGAGCACAT         |
| <i>CCL5</i>                    | TACCATGAAGGTCTCCGC           | GACAAAGACGACTGCTGG           |
| <i>TGF-<math>\beta</math></i>  | CCCACAACGAAATCTATGAC         | CCAGGAATTGTTGCTGTATT         |
| <i>Periostin</i>               | TGTTGCCCTGGTTATATGAG         | ACTCGGTGCAAAGTAAGTGA         |
| <i>IDO</i>                     | GCCCTTCAAGTGTTTCACCAA        | CCAGCCAGACAAATATATGCGA       |
| <i>CCR5</i>                    | GTATCTGGCATAGTATTCTGT        | ATCTCTGGTCTGAAGGTT           |
| <i>E-cadherin</i>              | TGCCCAGAAAATGAAAAAGG         | GTGTATGTGGCAATGCGTTC         |
| <i>Vimentin</i>                | GAGAACTTTGCCGTTGAAGC         | GCTTCCTGTAGGTGGCAATC         |
| <i>Snail</i>                   | CTGGGTGCCCTCAAGATGCA         | CCGGACATGGCCTTGTAGCA         |
| <i>Slug</i>                    | TACCGCTGCTCCATTCCACG         | CATGGGGTCTGAAAGCTTGG         |
| <i>ZEB1</i>                    | TGCACTGAGTGTGAAAAAGC         | TGGTGATGCTGAAAGAGACG         |
| <i>ZEB2</i>                    | CGGTATTGCCAACCCTCTGGA        | TTGTTGTGCCAGGGGTGTTCC        |
| <i>GAPDH</i>                   | TGCACCACCAACTGCTTAGC         | GGCATGGACTGTGGTCATGAG        |
